# Supplementary material for: Amino-modified halloysite nanotube-supported nickel catalysts for the efficient reductive amination of biomass aldehydes and ketones
Source: Royal Society of Chemistry journal article supplement (doi:10.1039/d5dt02705e), 2025-12-22
Supplement: d5dt02705e1.pdf [file d5dt02705e1.pdf]

## Supporting Information

### Amino-Modified Halloysite Nanotube-Supported Nickel Catalysts for Efficient Reductive Amination of Biomass Aldehydes and Ketones

*Weihong Li<sup>a</sup>, Nan Zhong<sup>b</sup>, Yifei Yin<sup>b</sup>, Weiming Xiao<sup>a</sup>, Shunmin Ding<sup>a</sup>, Rongping Zhou<sup>c</sup>, Chao Chen<sup>a</sup>, Shengjun Deng<sup>a</sup> \**

<sup>a</sup> Key Laboratory of Jiangxi Province for Environment and Energy Catalysis, college of Chemistry, Nanchang University, Nanchang, Jiangxi 330031, P.R. China

<sup>b</sup> School of Pharmacy, Nanchang University, Nanchang, Jiangxi 330031, P.R. China

<sup>c</sup> The first affiliated hospital of Nanchang university, Jiangxi 330006, P.R. China

\* Corresponding author: Shengjun Deng. E-mail: [shjdeng@ncu.edu.cn](mailto:shjdeng@ncu.edu.cn)

## S1. Materials and Characterization Instruments

Halloysite Nanotubes ( $\text{Al}_2\text{Si}_2\text{O}_5(\text{OH})_4 \cdot 2\text{H}_2\text{O}$ , 98%) was purchased from Yuanxin Nano technology Co., Ltd. Sodium borohydride ( $\text{NaBH}_4$ , 97%) was purchased from Shanghai Qingxi Chemical Technology Co., Ltd. Isopropanol ( $(\text{CH}_3)_2\text{CHOH}$ , 99%) was purchased from Xilong Scientific Co., Ltd. Nickel nitrate hexahydrate ( $\text{Ni}(\text{NO}_3)_2 \cdot 6\text{H}_2\text{O}$ , 98%) were purchased from Shanghai Aladdin Biochemical Science and Technology Co., Ltd.  $\gamma$ -aminopropyl triethoxysilane (APTES, 98%), anhydrous sodium bicarbonate ( $\text{NaHCO}_3$ , 98%), dodecane (99%), and furfural (FAL, 99%) were purchased from Innochem Reagent Co., Ltd. All chemical reagents in chemical analysis purity commercially obtained were used directly without further purification.

The Ni content of catalyst was determined by using Agilent Technologies 5100 Inductively Coupled Plasma Optical Emission Spectrometer (ICP-OES).

X-ray powder diffraction (XRD) patterns were recorded on a Persee XD-3X benchtop X-ray diffractometer with  $\text{Cu K}\alpha$  ( $k = 0.15406 \text{ nm}$ ) radiation at 40 kV and 40

mA with scanning rate of 4 °/min in the range of 10 ° - 70 ° (2 $\theta$ ).

FT-IR spectra (FT-IR) was collected with an Agilent Cary 630 Fourier Transform Infrared Spectrometer. Potassium bromide was used for sample preparation and analysis, with a scanning wavenumber range of 4000-400 cm<sup>-1</sup>. Transform infrared spectra of pyridine adsorption (Py-IR) was similar to the above process, except that pyridine was added dropwise to the prepared sample and then dried using an infrared lamp, repeating the above steps multiple times.

The specific surface area and pore structure of the sample were measured according to Brunauer-Emmett-Teller (BET) procedure on a Micromeritics ASAP 2020 analyzer. The sample was degassed under vacuum at 150 °C for 12 h prior to the physisorption measurements. The pore volume and pore size distribution were determined by BJH method.

X-ray photoelectron spectroscopy measurements (XPS) of the samples were analyzed on a Thermo Scientific K-Alpha equipped with a monochromatic Al K $\alpha$  source (h $\nu$  = 1486.6 eV). The C 1s peak of adventitious carbon at 284.8 eV was referred to rectify the binding energy in XPS spectra.

TEM images were acquired using a JEOL JEM-2100 microscope configured with an energy-dispersive X-ray spectroscopic analyzer conducted at an acceleration voltage of 200 kV. The sample was dispersed by sonication in hydrous ethanol. Then, the suspended solution was dropped and dried on carbon film-coated 400 mesh copper grids for morphological observation.

Temperature programmed desorption of H<sub>2</sub>, CO<sub>2</sub> and NH<sub>3</sub> (H<sub>2</sub>-TPD, CO<sub>2</sub>-TPD and NH<sub>3</sub>-TPD) experiments were carried out on a Micromeritics- Auto-Chem II 2920 chemisorption analyzer combined with a thermal conductivity detector and a computer-controlled furnace. Prior to measurement, 50 mg of sample was placed in a U-shaped quartz tube, and kept at 150 °C for 1 h in pure argon (30 mL/min), then cooled to room temperature under argon. The system was purged with H<sub>2</sub> for 1 h at 30 mL/min to remove the physically absorbed argon; Subsequently, the pure argon was switched into the system again for 30 min to purge H<sub>2</sub>. Finally, the sample was heated to 400 °C at a heating rate of 10 °C/min and desorption signals were monitored

by TCD. The measurement methods for NH<sub>3</sub>-TPD and CO<sub>2</sub>-TPD are similar to those for H<sub>2</sub>-TPD.

## S2. Preparation of Ni/Al<sub>2</sub>O<sub>3</sub> and Ni/SiO<sub>2</sub>

Typically, the Al<sub>2</sub>O<sub>3</sub> and Ni(NO<sub>3</sub>)<sub>2</sub>·6H<sub>2</sub>O with adjustable Al<sub>2</sub>O<sub>3</sub>: Ni mass ratio were added to 40 mL of deionized water. The reaction mixture was stirred for 1.5 h, then stirred for another 0.5 h in an ice water bath. Afterwards, a fresh prepared ice aqueous solution of sodium borohydride (NaBH<sub>4</sub> is 5 equiv to Ni) was added into the above mixture, and then stirred for 1 h. The precipitation was obtained by filtration, washed three times with deionized water, and washed once with ethanol. After vacuum drying, Ni/Al<sub>2</sub>O<sub>3</sub> was obtained. The Ni/SiO<sub>2</sub> was prepared using the procedure similar to that of Ni/Al<sub>2</sub>O<sub>3</sub> except that SiO<sub>2</sub> was used in the place of Al<sub>2</sub>O<sub>3</sub>.

## S3. Cycle experiment

Typically, 1 mmol of FAL, 0.05 g of 10%Ni-WHNT, and 15 mL of isopropanol were added and mixed in a 100 mL a stainless-steel high-pressure reactor. After sealed, the reactor was rinsed 7-10 times with H<sub>2</sub> (99.999%). After 0.5 MPa H<sub>2</sub> and 0.3 MPa NH<sub>3</sub> were filled, the experiments were conducted at the desired temperature (90 °C) and a specified reaction time (3 h) under constant magnetic stirring (450 rpm). After the reaction, the autoclave was naturally cooled down to room temperature and depressured slowly. The catalyst was separated by centrifugation, washed three times with ethanol, and dried at 70 °C in a vacuum oven. The recovered catalyst was used again another five times for the same reaction using the same procedure. The reaction mixture was analyzed by an Agilent 5977A MSD gas chromatography-mass spectrometry (GC-MS) employing HP-5 (30 m × 0.25 mm × 0.25 μm) column and thermal conductivity detector (TCD). The conversion and selectivity for the reaction were calculated as following:

$$\text{Conversion (\%)} = \left(1 - \frac{\text{moles of residual furfural}}{\text{moles of initial furfural}}\right) \times 100\%$$

$$\text{Selectivity (\%)} = \frac{\text{moles of target product}}{\text{moles of total products}} \times 100\%$$

#### S4. Shielding experiment

Triethylamine and benzoic acid served as shielding agents for acidic and basic sites, respectively. Initially, a certain amount (1: 1 molar ratio to FAL) of the shielding agent was mixed with the dispersion solution of the catalyst, allowing the shielding agent to interact with the catalyst for 30 min. The dispersion solution consists of 1 mmol FAL, 50  $\mu\text{L}$  dodecane, and 15 mL isopropanol. Subsequently, FAL was added to the solution for reaction.

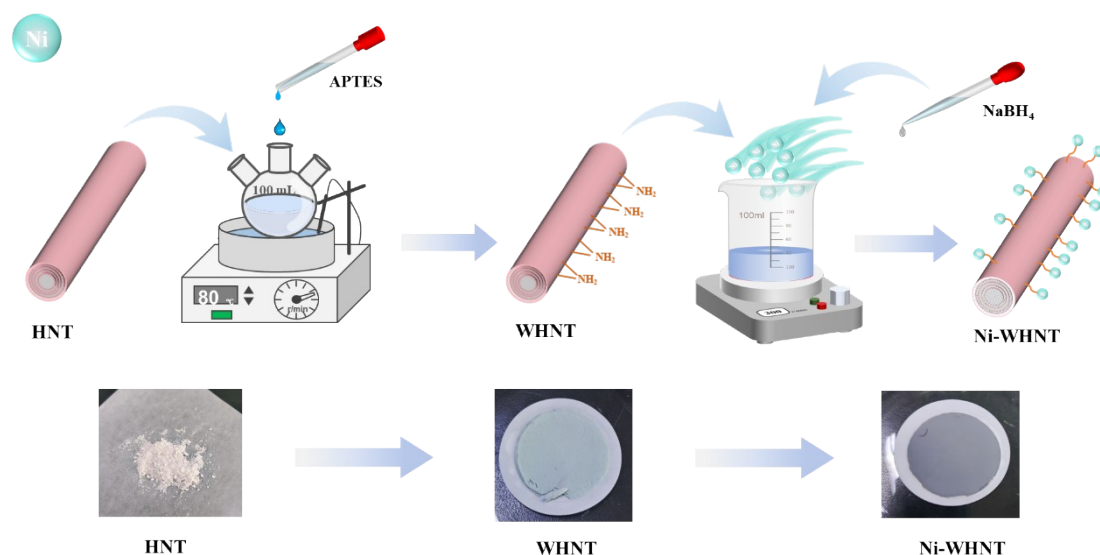

**Fig. S1.** Schematic illustration of synthesis process of catalyst.

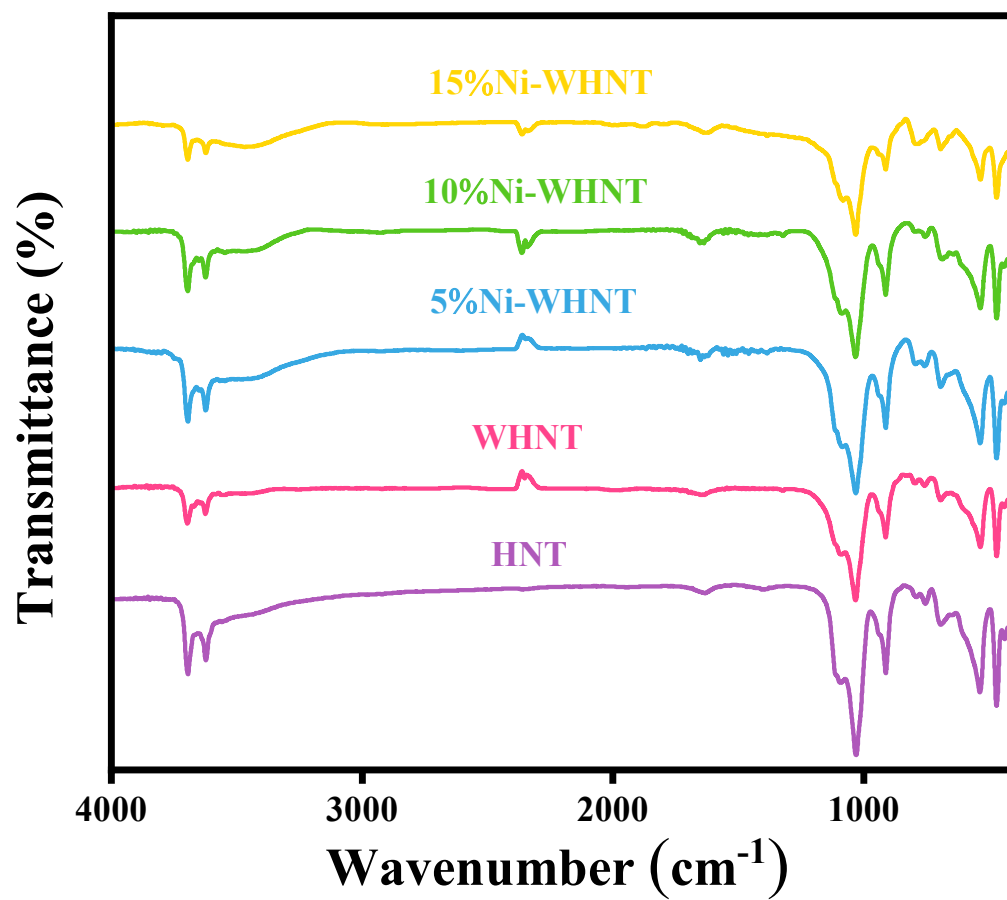

**Fig. S2.** FT-IR spectra of the typical catalyst samples.

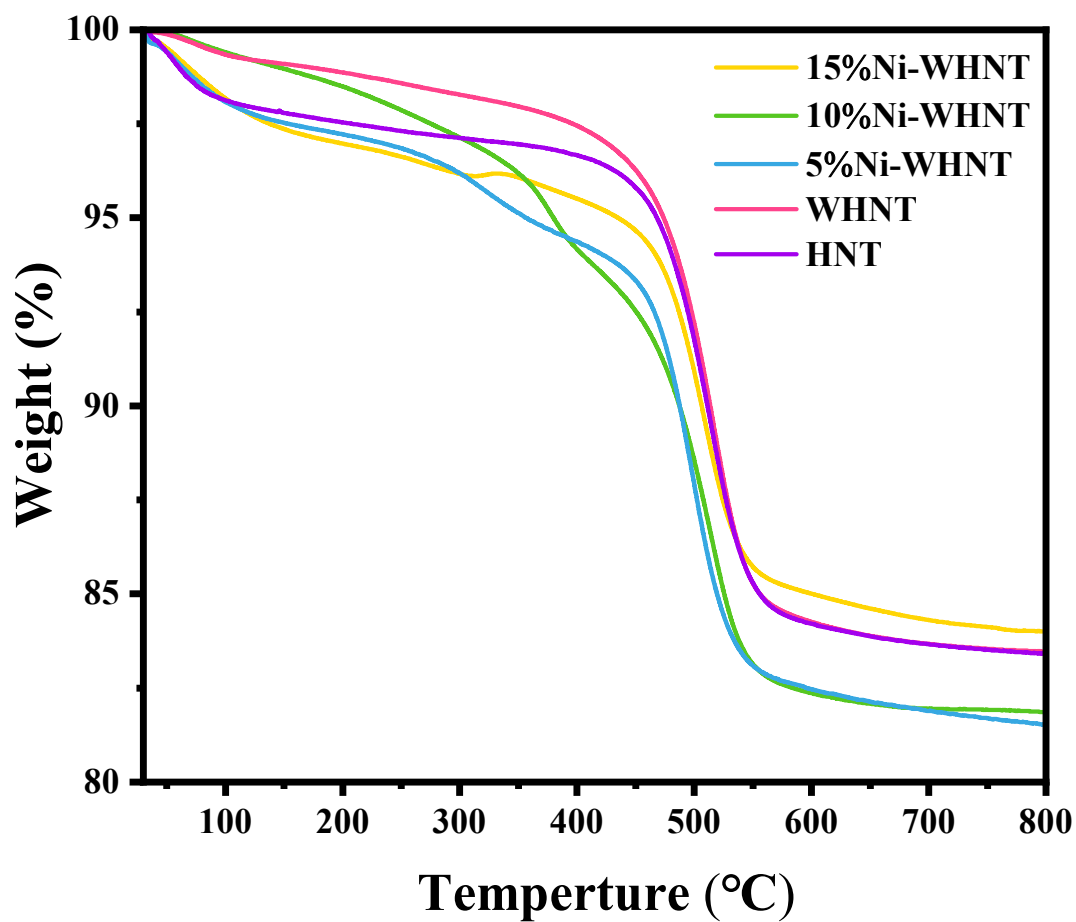

**Fig. S3.** TGA patterns of the typical catalyst samples.

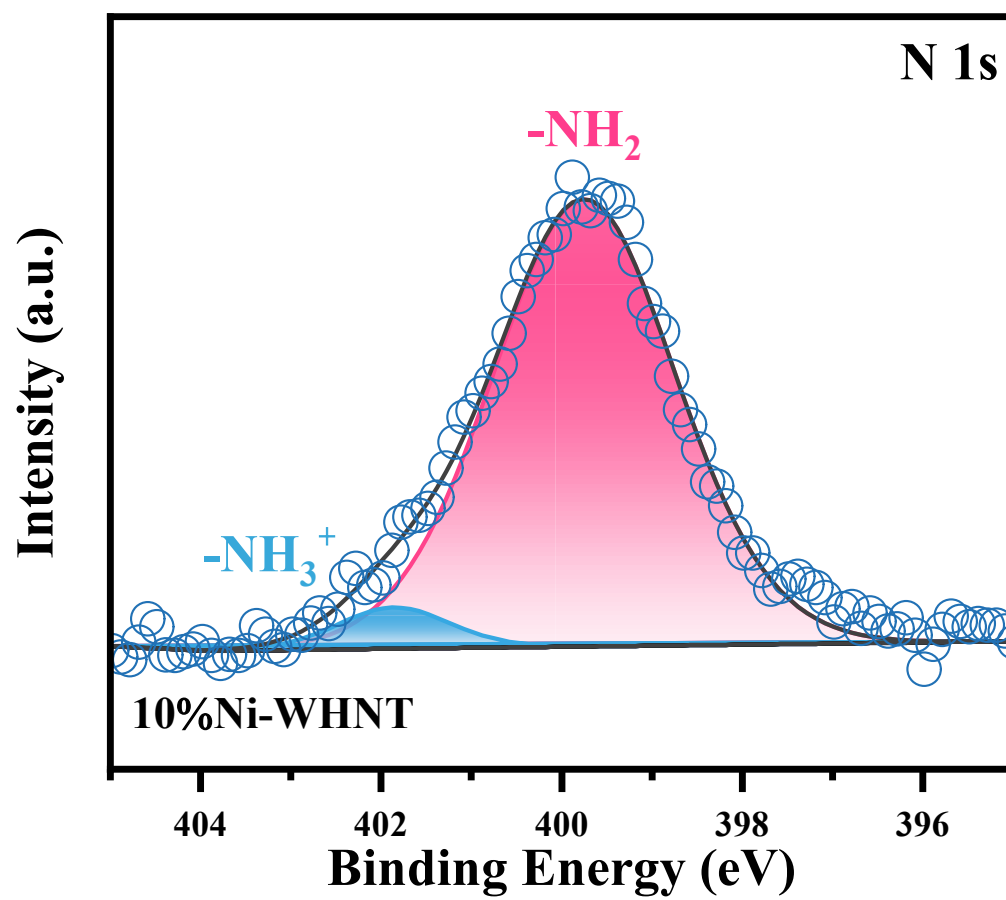

Fig. S4. N 1s XPS spectra of the 10%Ni-WHNT.

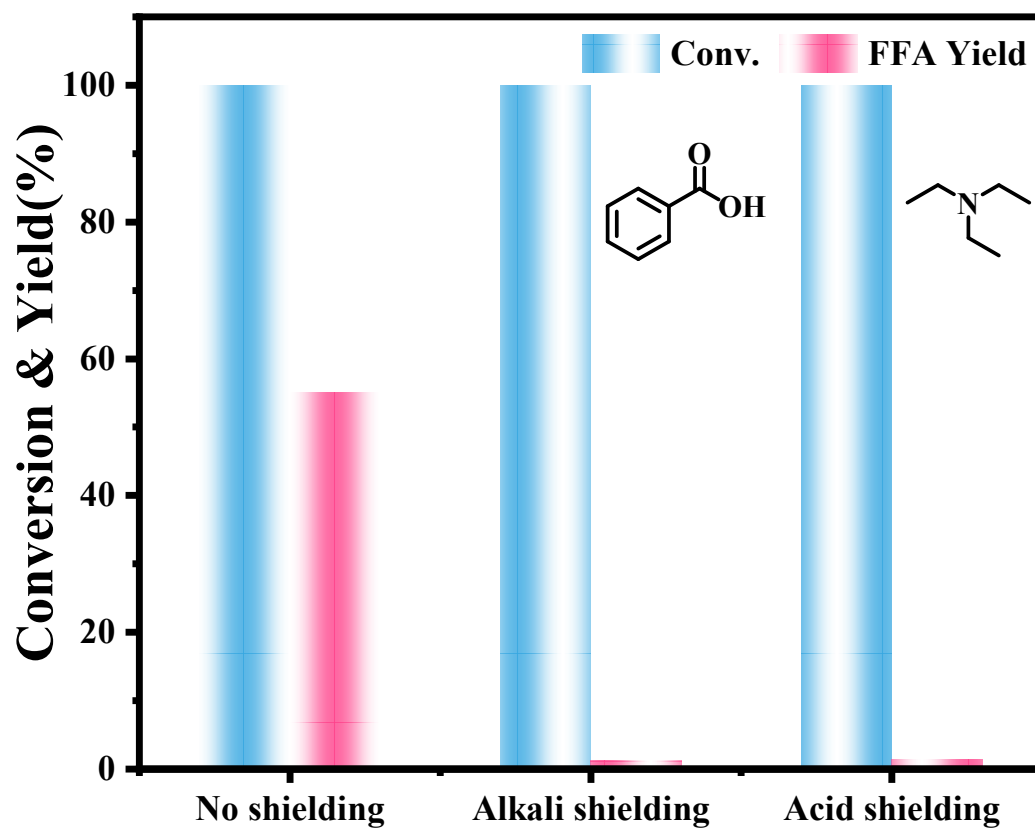

**Fig. S5.** Catalytic performance of the 10%Ni - WHNT catalyst in presence of different shielding agents at 1 h.



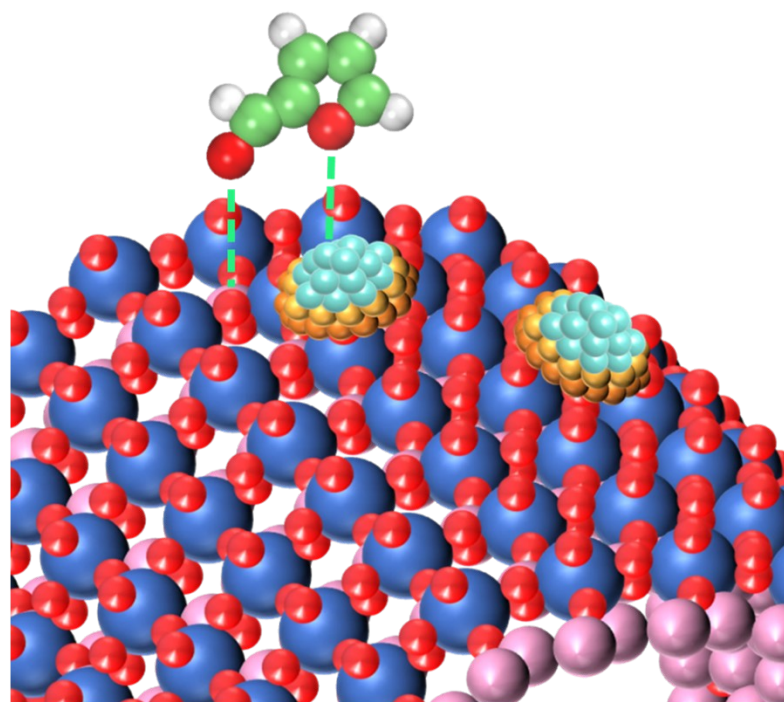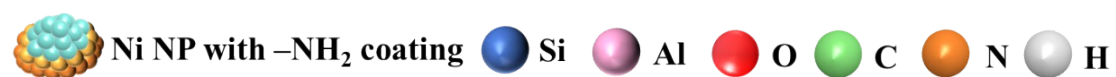

**Fig. S6.** The adsorption model of furfural on the Ni-WHNT catalyst.

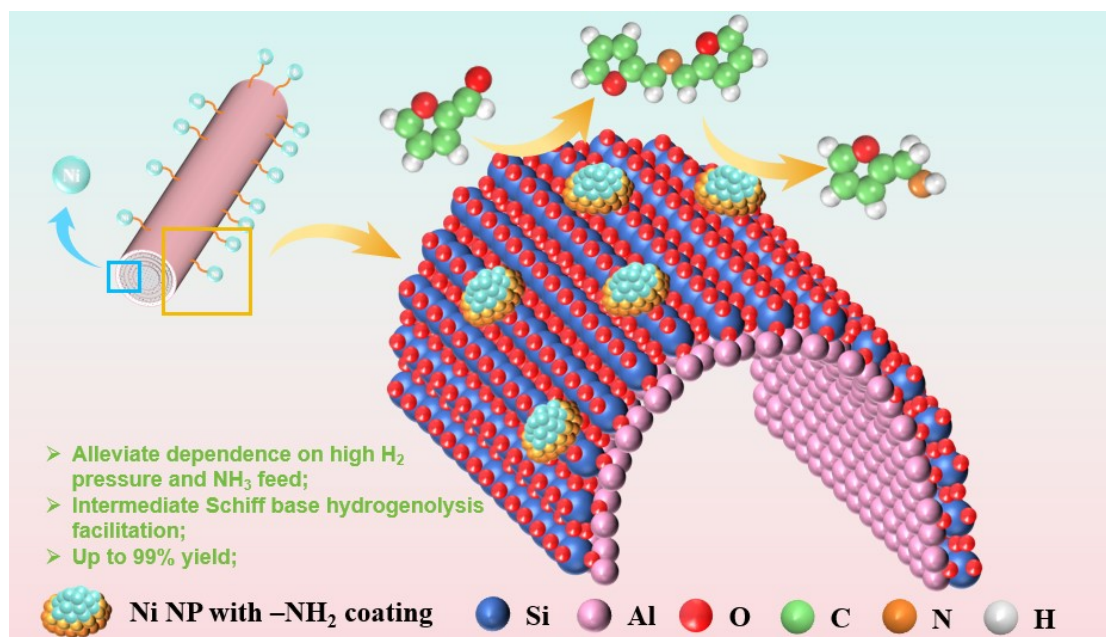

**Fig. S7.** Possible catalytic mechanism of key steps in tandem reductive amination over the Ni-WHNT catalyst.

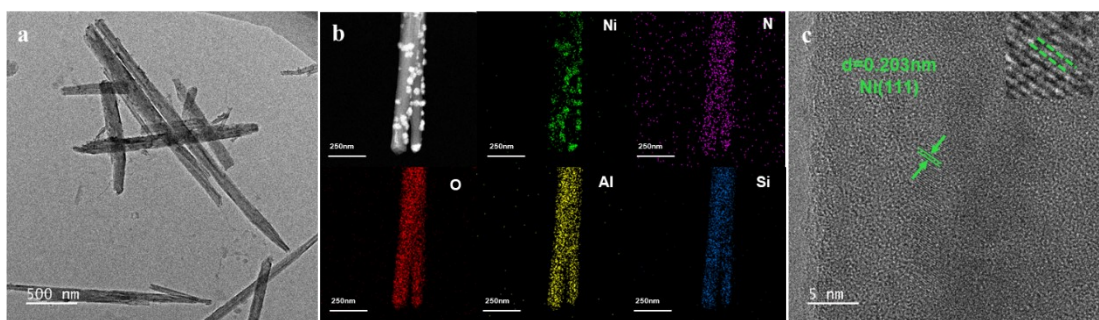

**Fig. S8.** (a) TEM image, (b) The corresponding EDS mappings, and (c) HRTEM images with enlarged images of the 2%Ni-WHNT catalyst.

**Table S1.** The Ni content of all samples.

| Entry | Catalysts                            | Ni(wt%) |
|-------|--------------------------------------|---------|
| 1     | 5%Ni-WHNT                            | 4.63    |
| 2     | 10%Ni-WHNT                           | 9.33    |
| 3     | 15%Ni-WHNT                           | 13.89   |
| 4     | 10%Ni-SiO <sub>2</sub>               | 9.31    |
| 5     | 10%Ni-Al <sub>2</sub> O <sub>3</sub> | 9.28    |
| 6     | After cycling10%Ni-WHNT              | 9.25    |

**Table S2.** Production of primary amines from various aldehydes and ketones over 10%Ni-WHNT.

| Entry | Substrate                                                                         |                                                                                   | Product                                                                           | Conv. (%) | Yield (%) |
|-------|-----------------------------------------------------------------------------------|-----------------------------------------------------------------------------------|-----------------------------------------------------------------------------------|-----------|-----------|
|       | 1                                                                                 | 2                                                                                 |                                                                                   |           |           |
| 1     |  |  |  | 88        | 50        |
| 2     |                                                                                   |  |  | > 99      | > 99      |
| 3     |  |                                                                                   |  | > 99      | > 99      |
| 4     |  | $\text{NH}_3$                                                                     |  | > 99      | > 99      |
| 5     |  |                                                                                   |  | > 99      | > 99      |
| 6     |  |                                                                                   |  | > 99      | 96        |

Reaction conditions: FAL (1 mmol), catalyst (50 mg), isopropanol (15 mL),  $\text{H}_2$  (1 MPa),  $\text{NH}_3$  (0.4 MPa), 120 °C, 8 h.

**Table S3.** Particle size of samples calculated based on XRD diffraction peak.

| Sample | k     | $\lambda$ | $2\theta$ | $\theta$ | $\cos \theta$ | FWHM  | $\beta$ | D(nm)  |
|--------|-------|-----------|-----------|----------|---------------|-------|---------|--------|
| HNT    | 0.890 | 0.154     | 11.921    | 5.961    | 0.995         | 0.713 | 0.012   | 11.073 |
|        | 0.890 | 0.154     | 20.185    | 10.092   | 0.985         | 1.216 | 0.021   | 6.560  |
|        | 0.890 | 0.154     | 23.575    | 11.787   | 0.979         | 4.608 | 0.080   | 1.742  |
|        | 0.890 | 0.154     | 35.366    | 17.683   | 0.953         | 1.469 | 0.026   | 5.613  |
|        | 0.890 | 0.154     | 38.226    | 19.113   | 0.945         | 1.952 | 0.034   | 4.260  |
|        | 0.890 | 0.154     | 55.395    | 27.697   | 0.885         | 3.201 | 0.056   | 2.772  |
|        | 0.890 | 0.154     | 62.260    | 31.130   | 0.856         | 0.956 | 0.017   | 9.602  |
| WHNT   | 0.890 | 0.154     | 11.541    | 5.771    | 0.995         | 0.685 | 0.012   | 11.524 |
|        | 0.890 | 0.154     | 19.896    | 9.948    | 0.985         | 1.331 | 0.023   | 5.994  |
|        | 0.890 | 0.154     | 23.540    | 11.770   | 0.979         | 4.158 | 0.073   | 1.930  |
|        | 0.890 | 0.154     | 35.025    | 17.513   | 0.954         | 1.481 | 0.026   | 5.564  |
|        | 0.890 | 0.154     | 37.943    | 18.972   | 0.946         | 2.086 | 0.036   | 3.983  |
|        | 0.890 | 0.154     | 54.874    | 27.437   | 0.888         | 2.230 | 0.039   | 3.969  |
|        | 0.890 | 0.154     | 61.941    | 30.970   | 0.857         | 0.672 | 0.012   | 13.628 |

**Table S4.** TONs of various catalysts and 10%Ni-WHNT for the reductive amination of FAL to FAM.

| Catalyst                                 | Load capacity (wt%) | FAM Yield (%) | TON  | Ref.      |
|------------------------------------------|---------------------|---------------|------|-----------|
| Ni/SiO <sub>2</sub> -I-DP                | 15                  | 90.7          | 17.7 | 1         |
| Ni/ Al <sub>2</sub> O <sub>3</sub> (110) | —                   | 1             | 0.2  | 2         |
| Ni/Al <sub>2</sub> O <sub>3</sub> (111)  | —                   | 97            | 33.4 | 2         |
| Ni/MC                                    | 3.8                 | 88            | 6.8  | 3         |
| Ni/ Al <sub>2</sub> O <sub>3</sub>       | 10                  | > 99          | 11.6 | 4         |
| Ni <sub>6</sub> AlO <sub>x</sub>         | —                   | 90            | 2.3  | 4         |
| Raney Ni                                 | —                   | > 99          | 1.3  | 4         |
| Raney Co                                 | —                   | 98            | 11.6 | 5         |
| 10%Ni-WHNT                               | 9.3                 | > 99          | 12.6 | This work |

## Reference

1. Yang, Y.; Zhou, L.; Wang, X.; et al. Catalytic reductive amination of furfural to furfurylamine on robust ultra-small Ni nanoparticles. *Nano Res.* **2023**, *16*(3), 3719-3729.
2. Wan, Y. J.; Ma, P. F.; Lu, H. L.; et al. External [1 1 1] facets on nanorod gamma alumina boosts catalytic reductive amination of carbonyl compound to primary amine. *J. Catal.* **2024**, *429*, 115–125.
3. Zhang, Y. M.; Yang, H. M.; Chi, Q.; et al. Nitrogen-Doped Carbon-Supported Nickel Nanoparticles: A Robust Catalyst to Bridge the Hydrogenation of Nitriles and the Reductive Amination of Carbonyl Compounds for the Synthesis of Primary Amines. *ChemSusChem.* **2019**, *12*(6), 1246 –1255.
4. Dong, C. L.; Wang, Y. S.; Peng, H. T.; et al. Facile and Efficient Synthesis of Primary Amines via Reductive Amination over a Ni/Al<sub>2</sub>O<sub>3</sub> Catalyst. *ACS Sustainable Chem. Eng.* **2021**, *9*(21), 7318–7327.
5. Zhou, K.; Chen, B. X.; Zhou, X. T.; et al. Selective Synthesis of Furfurylamine by Reductive Amination of Furfural over Raney Co. *ChemCatChem.* **2019**, *11*(22), 5562-5569.
